# Supplementary material
Source: PubMed Central journal article supplement (PMC5952388)
Supplement: JB.00737-17_zjb999094755s1.pdf [file JB.00737-17_zjb999094755s1.pdf]

1 **Supplementary Figures:**

A

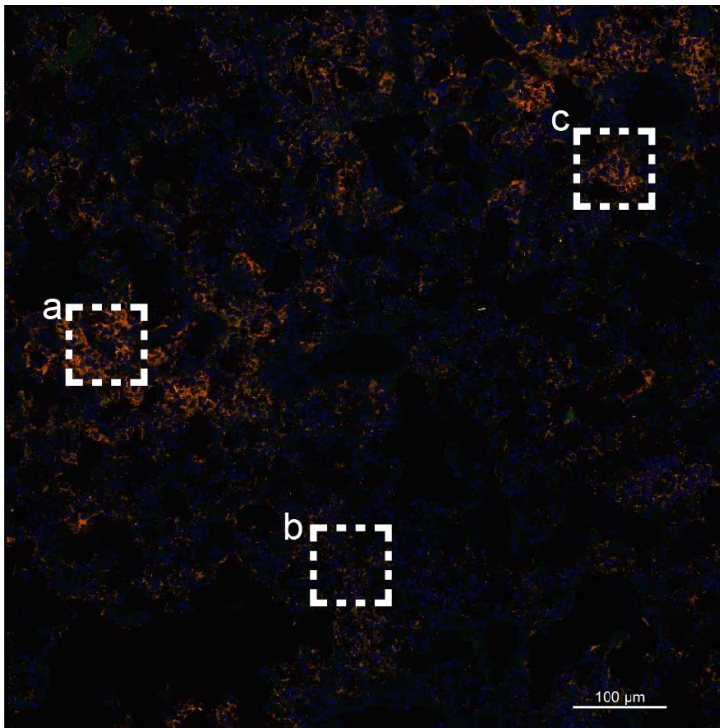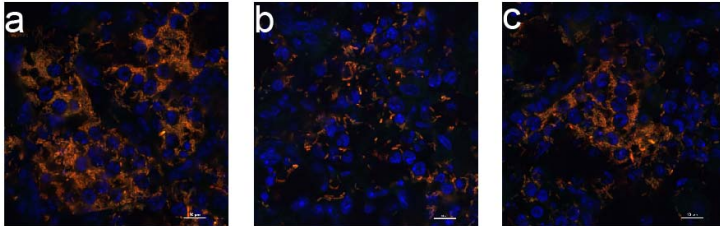

B

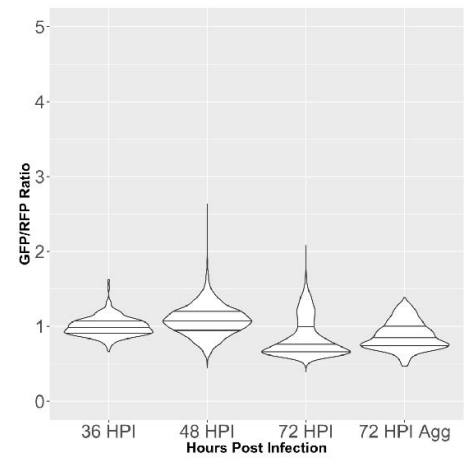

C

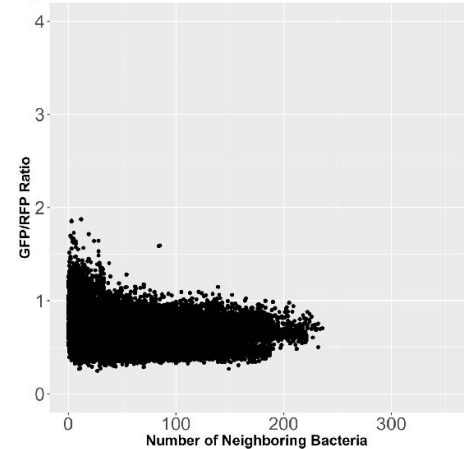

2

3 **Figure S1. No increased spatiotemporal expression of *gfp* driven from the constitutive *tetO***  
4 **promoter.**

5 Cross sections of lungs from mice infected with CO92 with the *PtetO*-GFP reporter  
6 (green) and pGEN-RFP plasmid (red) were stained with DAPI (blue) and imaged by confocal  
7 microscopy. (A) Large images were generated with the tile feature in NIS elements acquisition  
8 software to cover *Y. pestis* containing lesions within the lung space. (a-c) Magnified images from  
9 selected regions of the bigger lesion in (A). (B) Violin plots displaying the relative expression of  
10 *tetO* as a ratio of GFP/RFP quantified in individual cells combined from the lung lesions of at

11 least three mice at each time-point, across two independent infection experiments at 36, 48, and  
12 72 hpi. Horizontal lines within the violins represent the 25<sup>th</sup> percentile, median, and 75<sup>th</sup>  
13 percentile. Aggregates were also imaged and analyzed separately. (C) Expression of *tetO* in  
14 individual cells as a function of neighboring bacterial cell density from all images and time  
15 points post infection.

16

17

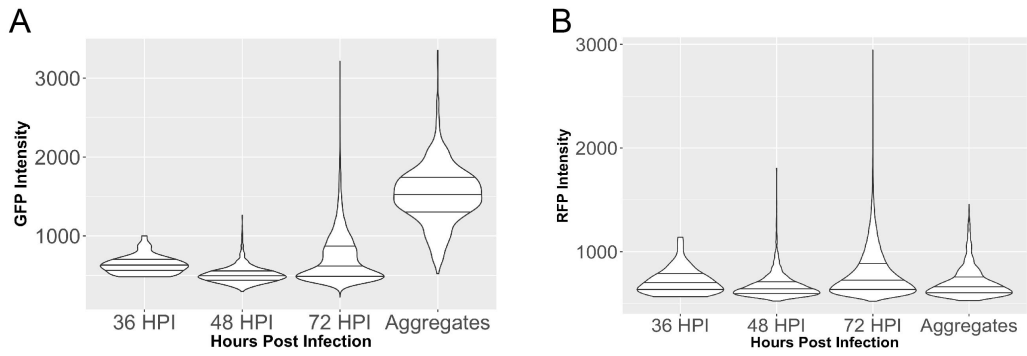

18

19 **Figure S2. Separated GFP and RFP channels for  $P_{crp}$ -GFP infections.**

20 (A) GFP and (B) RFP intensities alone measured from FIJI analysis at 36, 48, and 72 hpi  
 21 and within aggregates of cells in the lungs. Horizontal lines within the violins represent the 25<sup>th</sup>  
 22 percentile, median, and 75<sup>th</sup> percentile.

23

24

25

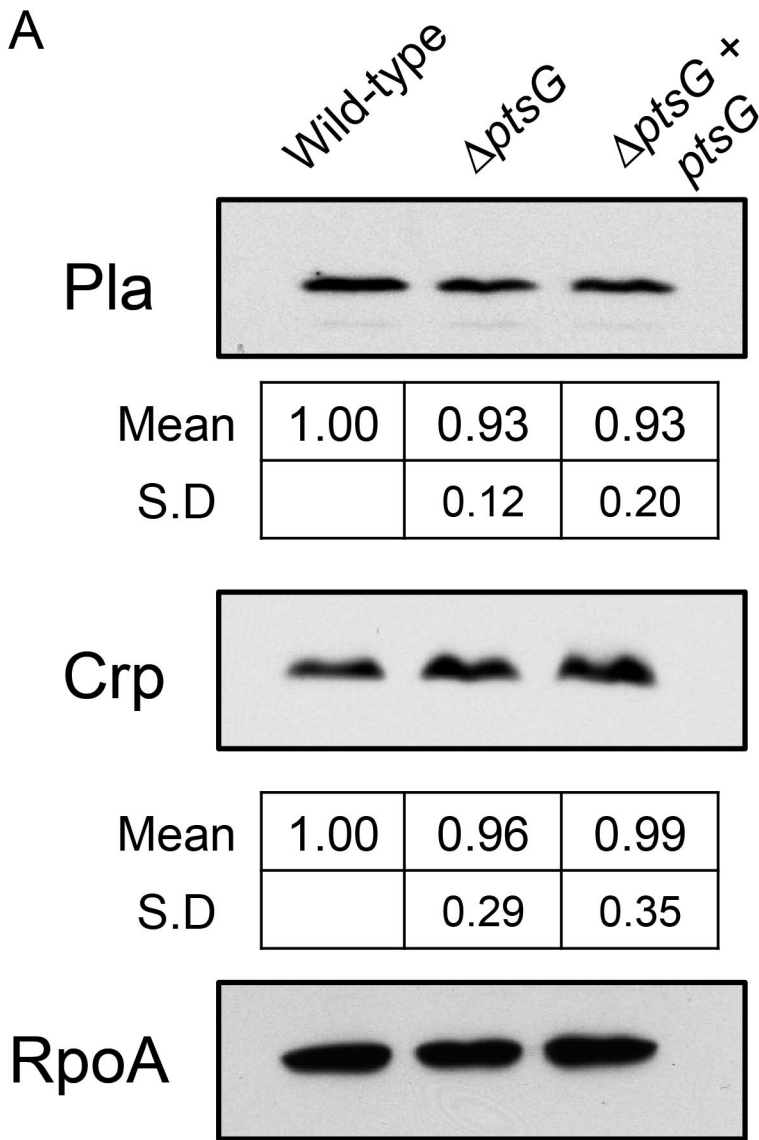

27

28 **Figure S3. Deletion of *ptsG* does not alter levels of Crp and Pla protein levels *in vitro*.**

29 (A) Representative blots of Crp and Pla protein levels of *Y. pestis* LCR-, *Y. pestis* LCR-  $\Delta ptsG$ ,  
 30 and *Y. pestis* LCR-  $\Delta ptsG + ptsG$  grown in BHI for 6 hours at 37°C. Quantification of Pla/RpoA

31 and Crp/RpoA ratios were measured in FIJI and standardized to wild-type *Y. pestis* from three  
32 independent experiments.

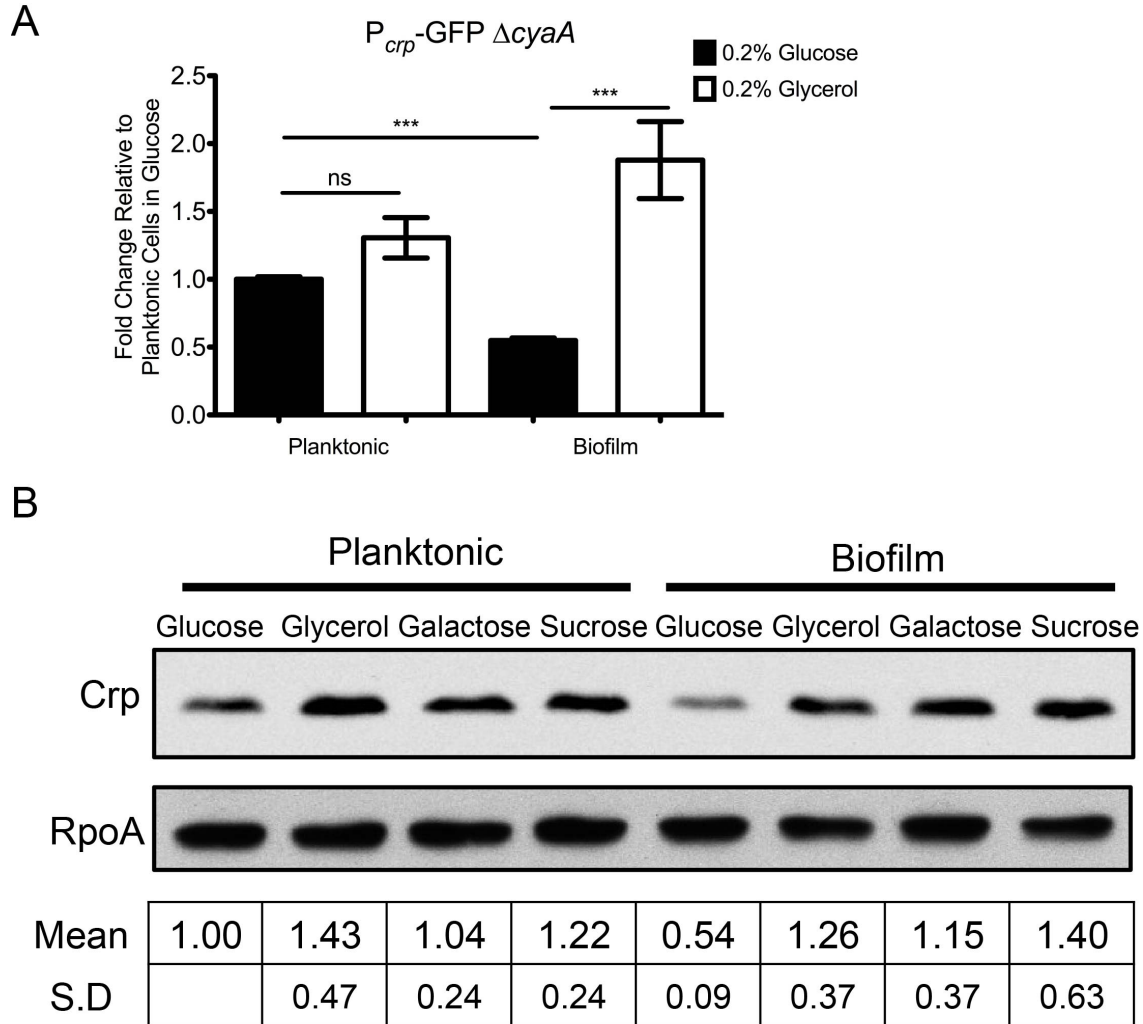

33

34 **Figure S4. Repression of *crp* expression in biofilms does not require *cyaA* and is specific to**  
 35 **glucose.**

36 (A) *Y. pestis*  $\Delta cyaA$  with the  $P_{crp}$ -GFP reporter was grown in TMH supplemented with  
 37 0.2% glucose (black bars) or 0.2% glycerol (white bars) overnight. Planktonic and biofilm cells  
 38 were separated and GFP intensity was standardized to planktonic cells grown in 0.2% glucose.

39 (B) Representative blot measuring Crp protein levels in *Y. pestis* LCR- grown in TMH

40 supplemented with either 0.2% glucose, 0.2% glycerol, 0.2% galactose, or 0.2% sucrose  
41 overnight. Quantification of Crp/RpoA ratio was measured in FIJI and was standardized to  
42 planktonic cells in 0.2% glucose from three independent experiments.

43

44

45 **Supplemental Information**

46

47 Table S1. Bacterial strains used in this study

48

| <i>Y. pestis</i> strains                               | Designation | Genotype/Characteristics                                                               | Source    |
|--------------------------------------------------------|-------------|----------------------------------------------------------------------------------------|-----------|
| CO92                                                   | SAN3        | wild-type, pCD1+, pMT+, pPCP1+, pgm+                                                   | Lab Stock |
| CO92 $\Delta ptsG$                                     | SAN321      | $\Delta ptsG$ , pCD1+, pMT+, pPCP1+, pgm+                                              | This work |
| CO92 $\Delta ptsG$ + <i>ptsG</i>                       | SAN323      | $\Delta ptsG$ , pCD1+, pMT+, pPCP1+, pgm+, <i>attTn7</i> : <i>ptsG</i> complement      | This work |
| CO92 <i>Pcrp</i> -GFP RFP+                             | SAN237      | pCD1+, pMT+, pPCP1+, pgm+, pGEN-RFP, <i>attTn7</i> : <i>Pcrp</i> -GFP                  | This work |
| CO92 <i>Ppla</i> -GFP RFP+                             | SAN235      | pCD1+, pMT+, pPCP1+, pgm+, pGEN-RFP, <i>attTn7</i> : <i>Ppla</i> -GFP                  | This work |
| CO92 <i>PtetO</i> -GFP RFP+                            | SAN289      | pCD1+, pMT+, pPCP1+, pgm+, pGEN-RFP, <i>attTn7</i> : <i>PtetO</i> -GFP                 | This work |
| CO92 <i>Pcrp-tetO</i> 5'UTR-GFP RFP+                   | SAN239      | pCD1+, pMT+, pPCP1+, pgm+, pGEN-RFP, <i>attTn7</i> : <i>Pcrp-tetO</i> 5'UTR-GFP        | This work |
| CO92 $\Delta ptsG$ <i>Pcrp</i> -GFP RFP+ $\Delta ptsG$ | SAN327      | $\Delta ptsG$ , pCD1+, pMT+, pPCP1+, pgm+, pGEN-RFP, <i>attTn7</i> : <i>Pcrp</i> -GFP  | This work |
| CO92 $\Delta ptsG$ <i>Ppla</i> -GFP RFP+               | SAN333      | $\Delta ptsG$ , pCD1+, pMT+, pPCP1+, pgm+, pGEN-RFP, <i>attTn7</i> : <i>Ppla</i> -GFP  | This work |
| CO92 $\Delta ptsG$ <i>PtetO</i> -GFP RFP+              | SAN335      | $\Delta ptsG$ , pCD1+, pMT+, pPCP1+, pgm+, pGEN-RFP, <i>attTn7</i> : <i>PtetO</i> -GFP | This work |
| CO92 LCR-                                              | PAN259      | pCD1-, pMT+, pPCP1+, pgm+                                                              | Lab Stock |
| CO92 LCR- $\Delta ptsG$                                | PAN1020     | $\Delta ptsG$ , pCD1-, pMT+, pPCP1+, pgm+                                              | This work |
| CO92 LCR- $\Delta ptsG$ + <i>ptsG</i>                  | PAN1024     | $\Delta ptsG$ , pCD1-, pMT+, pPCP1+, pgm+, <i>attTn7</i> : <i>ptsG</i> complement      | This work |
| CO92 LCR- Promoterless GFP                             | PAN494      | pCD1-, pMT+, pPCP1+, pgm+, <i>attTn7</i> : GFP                                         | (1)       |
| CO92 LCR- <i>Pcrp</i> -GFP                             | PAN578      | pCD1-, pMT+, pPCP1+, pgm+, <i>attTn7</i> : <i>Pcrp</i> -GFP                            | (1)       |
| CO92 LCR- <i>Ppla</i> -GFP                             | PAN607      | pCD1-, pMT+, pPCP1+, pgm+, <i>attTn7</i> : <i>Ppla</i> -GFP                            | (1)       |
| CO92 LCR- <i>Pcrp-tetO</i> 5'UTR-GFP                   | PAN828      | pCD1-, pMT+, pPCP1+, pgm+, <i>attTn7</i> : <i>Pcrp-tetO</i> 5'UTR-GFP                  | This work |
| CO92 LCR- $\Delta cyaA$ Promoterless GFP               | PAN749      | pCD1-, pMT+, pPCP1+, pgm+, <i>attTn7</i> : GFP $\Delta cyaA$                           | This work |



49

|                                            |        |                                                                                     |           |
|--------------------------------------------|--------|-------------------------------------------------------------------------------------|-----------|
| CO92 LCR-<br><i>ΔcyaA</i> <i>Pcrp</i> -GFP | PAN857 | pCD1-, pMT+, pPCP1+, <i>pgm</i> +,<br><i>attTn7</i> : <i>Pcrp</i> -GFP <i>ΔcyaA</i> | This work |
|--------------------------------------------|--------|-------------------------------------------------------------------------------------|-----------|

50 Table S2. Plasmids used in this study.

51

| E. coli Strain | Strain                | Name                  | Description                                                                                                                            | Source    |
|----------------|-----------------------|-----------------------|----------------------------------------------------------------------------------------------------------------------------------------|-----------|
| LAN24          | CC118 $\lambda$ -pir  | puc18R6 K-mini-tn7-km | Plasmid backbone used for Tn7 integration                                                                                              | Lab stock |
| LAN25          | DH5aF' $\lambda$ -pir | pTNS2                 | Tn7 transposase helper plasmid                                                                                                         | Lab Stock |
| LAN29          | DH5a                  | pSkippy               | IPTG-inducible FLP recombinase plasmid                                                                                                 | Lab Stock |
| LAN308         | S17 $\lambda$ -pir    | pLB30                 | Contains entire CDS of gfp cloned into pUC18R6K-mini-Tn7-km                                                                            | (1)       |
| LAN357         | S17 $\lambda$ -pir    | pLB35                 | Contains 496 bp upstream through first 27 nt of <i>crp</i> CDS fused to CDS of GFP cloned into BamHI/PstI site of puc18R6K-mini-tn7-km | (1)       |
| LAN375         | S17 $\lambda$ -pir    | pLB38                 | Contains 500 bp upstream through first 27 nt of <i>pla</i> CDS fused to CDS of GFP cloned into BamHI/PstI site of puc18R6K-mini-tn7-km | (1)       |
| LAN450         | EC100D $\lambda$ -pir | pJR04                 | Contains <i>Pcrp-tetO</i> 5'UTR-GFP construct cloned into BamHI/PstI site of puc18R6K-mini-Tn7-km                                      | This work |
| LAN468         | Top10                 | pGEN-RFP              | Constitutive dsredT3 expression under control of em7 promoter                                                                          | (2)       |
| LAN501         | S17 $\lambda$ -pir    | pJR25                 | Contains <i>PtetO</i> -GFP construct cloned into BamHI/PstI site of puc18R6K-mini-Tn7-km                                               | This work |

52

53

54 Table S3. Primers used in this study.  
55

| Name  | Sequence                                                                     | Purpose                                                         |
|-------|------------------------------------------------------------------------------|-----------------------------------------------------------------|
| P63   | GTGTAGGCTGGAGCTGCTTC                                                         | Amplification of Kan cassette for Lambda Red                    |
| P64   | ATTCCGGGGATCCGTCGACC                                                         | Amplification of Kan cassette for Lambda Red                    |
| P345  | AACTGCAGCTTTCACCAGCGTTTCTGGGTG                                               | 5' amplification of <i>tetO</i> promoter with PstI              |
| P346  | GGGTACCTTTCTCCTCTTTAATG                                                      | 3' amplification of <i>tetO</i> promoter                        |
| P1089 | CGGGATCCTTATTTGTATAGTTCATCCATG<br>CCATGTG                                    | 3' amplification of <i>gfp</i> into BamHI Tn7                   |
| P1554 | CTGCAGGACACGACATCAATGGCGCTACA<br>CCCCCCCCG                                   | 5' amplification 496bp upstream of <i>crp</i> with PstI         |
| P1772 | ATCAGCAGGACGCACTGACCGAATTCATT<br>AAAGAGGAGAAAGGTACCCATGAGTAAAG<br>GAGAAGAAC  | 5' amplification of <i>gfp</i> with <i>tetO</i> 5'UTR overhang  |
| P1773 | GGGTACCTTTCTCCTCTTTAATGAATTCGG<br>TCAGTGCCTCCTGCTGATCTTTCTTTTAGC<br>ATATTAAC | 3' amplification of <i>Pcrp</i> with <i>tetO</i> 5'UTR overhang |
| P1993 | ATAGGCTGTTGGTGGAAACAG                                                        | Deletion of <i>ptsG</i> by Lambda Red Recombination             |
| P1994 | GAAGCAGCTCCAGCCTACACAGTTGAGCG<br>TGCTCCTGAGTAATAG                            | Deletion of <i>ptsG</i> by Lambda Red Recombination             |
| P1995 | GGTCGACGGATCCCCGGAATTTTCAGGTAG<br>GGGAGAGCAAAAG                              | Deletion of <i>ptsG</i> by Lambda Red Recombination             |
| P1996 | TCAACGTAATACCCTCGACACC                                                       | Deletion of <i>ptsG</i> by Lambda Red Recombination             |
| P1997 | GGGGGATCCATAGGCTGTTGGTGGAAACA<br>G                                           | Complementation of <i>ptsG</i> into BamHI/PstI Tn7              |
| P1998 | GGGCTGCAGTCAACGTAATACCCTCGACA<br>CC                                          | Complementation of <i>ptsG</i> into BamHI/PstI Tn7              |

56  
57  
58

59 **REFERENCES**

60

61 1. Lathem WW, Schroeder JA, Bellows LE, Ritzert JT, Koo JT, Price PA, Caulfield AJ,

62 Goldman WE. 2014. Posttranscriptional regulation of the *Yersinia pestis* cyclic AMP

63 receptor protein Crp and impact on virulence. MBio 5:e01038-13.

64 2. Price PA, Jin J, Goldman WE. 2012. Pulmonary infection by *Yersinia pestis* rapidly

65 establishes a permissive environment for microbial proliferation. Proc Natl Acad Sci U S

66 A 109:3083-8.
